## RESEARCH ARTICLE

# Little cigars and cigarillos harbor diverse bacterial communities that differ between the tobacco and the wrapper

Suhana Chattopadhyay<sup>1</sup>, Eoghan M. Smyth<sup>1,2</sup>, Prachi Kulkarni<sup>1</sup>, Kelsey R. Babik<sup>1</sup>, Molly Reid<sup>1</sup>, Lauren E. Hittle<sup>2</sup>, Pamela I. Clark<sup>3</sup>, Emmanuel F. Mongodin<sup>2☉‡</sup>, Amy R. Sapkota<sup>☉1☉‡\*</sup>

**1** Maryland Institute for Applied Environmental Health, University of Maryland School of Public Health, College Park, Maryland, United States of America, **2** Institute for Genome Sciences and Department of Microbiology and Immunology, University of Maryland, School of Medicine, Baltimore, Maryland, United States of America, **3** Department of Behavioral and Community Health, University of Maryland, School of Public Health, College Park, Maryland, United States of America

☉ These authors contributed equally to this work.

‡ These authors shared senior co-authorship on this work.

\* [ars@umd.edu](mailto:ars@umd.edu)

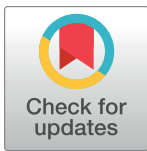

## OPEN ACCESS

**Citation:** Chattopadhyay S, Smyth EM, Kulkarni P, Babik KR, Reid M, Hittle LE, et al. (2019) Little cigars and cigarillos harbor diverse bacterial communities that differ between the tobacco and the wrapper. PLoS ONE 14(2): e0211705. <https://doi.org/10.1371/journal.pone.0211705>

**Editor:** Ulrich Melcher, Oklahoma State University, UNITED STATES

**Received:** July 26, 2018

**Accepted:** January 18, 2019

**Published:** February 22, 2019

**Copyright:** © 2019 Chattopadhyay et al. This is an open access article distributed under the terms of the [Creative Commons Attribution License](https://creativecommons.org/licenses/by/4.0/), which permits unrestricted use, distribution, and reproduction in any medium, provided the original author and source are credited.

**Data Availability Statement:** The datasets generated during the current study are available in the NCBI BioProject database under BioProject accession number PRJNA473598.

**Funding:** This study was funded by grant number P50CA180523 from the National Cancer Institute and the Food and Drug Administration, Center for Tobacco Products awarded to the University of Maryland to authors PIC, EFM, and ARS, <https://www.cancer.gov/about-nci/budget/fact-book/extramural-programs>. The content is solely the

## Abstract

Despite their potential importance with regard to infectious and chronic diseases among tobacco users, microbial constituents of tobacco products lack characterization. Specifically, to our knowledge, there are no data describing the bacterial diversity of little cigars or cigarillos. To address this knowledge gap, we tested four brands of little cigars and cigarillos. Tobacco and wrapper subsamples (n = 132) were separately subjected to DNA extraction, followed by PCR amplification of the V3V4 hypervariable region of the 16S rRNA gene, and sequencing using Illumina HiSeq. Sequences were analyzed using QIIME and Phyloseq implemented in R. We identified 2,681 operational taxonomic units across all products. Significant differences in alpha and beta diversity were observed between Swisher Sweets and Cheyenne products. Alpha and beta diversity was also significantly different between tobacco and wrapper subsamples within the same product. Beta diversity analyses of only tobacco samples identified no significant differences in the bacterial microbiota of different lots of the same products; however, the microbiota in the wrapper differed significantly across lots for all brands. Overall, *Firmicutes* were found to dominate in the wrapper, whereas *Proteobacteria* were most abundant in the tobacco. At the genus level, *Bacillus* and *Lactobacillus* dominated in the wrappers, and *Staphylococcus* and *Pseudomonas* dominated in the tobacco. Our findings suggest that the bacterial microbiota of little cigars and cigarillos is diverse and differs significantly between the tobacco and the wrapper, and across brands. Future work is necessary to evaluate the potential public health implications of these findings.

responsibility of the authors and does not necessarily represent the official views of the NIH or the Food and Drug Administration. The funders had no role in study design, data collection and analysis, decision to publish, or preparation of the manuscript.

**Competing interests:** The authors have declared that no competing interests exist.

## Introduction

Cigars are a heterogeneous category of combustible tobacco products that includes little cigars, cigarillos and traditional (or large) cigars. Little cigars are similar in size to cigarettes, however, the tobacco of little cigars is wrapped in brown paper that typically contains some tobacco leaf, and little cigars are produced with or without a filter [1]. Little cigars provide a similar feel and draw to the user as smoking a cigarette; however, cigarillos (or ‘seven minute cigars’) are more like traditional cigars, containing about 3g of tobacco wrapped in tobacco leaves or brown paper mixed with tobacco leaves [1]. Cigarillos are thinner and smaller in diameter than a traditional cigar but longer than a normal cigarette [2], and, unlike traditional cigars, cigarillos are smoked with a deeper inhalation [3].

Little cigars and cigarillos are taxed lower than cigarettes across most of the US, making them a potentially more affordable product compared to cigarettes [4]. Little cigars and cigarillos can also be lawfully sold as “singles” or “loose” without health warnings compared to “packages of 20” cigarettes [5]. In addition, Kostygina et al. (2016) recently showed how flavoring of little cigars and cigarillos appeals to a larger consumer market, attracting young adults, women, low-income minority groups and non-users [6]. In 2013, roughly 12.4 million people (12 years or older) in the U.S. smoked cigars, and between 1995 and 2008 there was a 316% and 255% rise in sales of little cigars and cigarillos, respectively [7].

Given the increasing sales and consumption of little cigars and cigarillos [8,9], cigar smoking has been linked to an increasing number of health issues [10,11], ranging from coronary heart disease and chronic pulmonary diseases to cancers of the lungs [12], pharynx, esophagus, pancreas and bladder [13]. Compared to cigarettes, higher concentrations of nitrogen oxides, ammonia and carcinogenic compounds (e.g. tobacco-specific nitrosamines (TSNAs)) have been detected in the smoke of traditional cigars and play a role in the development of adverse health outcomes among users [10]. In addition, little cigars and cigarillos contain 2–5 times the amount of nicotine compared to cigarettes [14] and are inhaled rather than smoked like a cigar, increasing users’ exposures to chemical constituents. Through these deep inhalations, users of little cigars and cigarillos could also be chronically exposed to microbial constituents that could play a role in the development of both acute and chronic illnesses.

Previous studies by our group and others have characterized a wide array of bacterial populations within the tobacco microenvironment of mentholated and non-mentholated cigarettes [15–17] and smokeless tobacco products [18,19]. In cigarette products, we have shown that different brands are characterized by significantly different bacterial communities. We have also demonstrated that mentholation is correlated with a reduction in potential human bacterial pathogens [16] and selection for bacterial members that are resistant to harsher environmental conditions. Within smokeless tobacco products, we have detected viable and highly diverse bacterial populations predominantly belonging to the phyla *Firmicutes*, *Proteobacteria* and *Actinobacteria* [15,17].

However, to our knowledge, there are no available data regarding bacterial constituents of little cigars and cigarillos and their impacts on public health. This critical knowledge gap limits our understanding of microbial-related health risks associated with little cigar and cigarillo use. Therefore, in this study we characterized the bacterial community composition of little cigars and cigarillos and focused on whether bacterial communities differed between the tobacco and wrappers of these products.

## Materials and methods

### Sample collection

Little cigars and cigarillos were purchased from online vendors in the Spring of 2015. Four different brands were included: 1) Swisher sweets cigarillo natural sweet (SSO, Swisher International Inc., Jacksonville, FL, USA); 2) Swisher sweets little cigars sweet cherry flavor (SSC, Swisher International Inc., Jacksonville, FL, USA); 3) Cheyenne full flavor 100's (CFF, Cheyenne International LLC, Grover, NC, USA); and 4) Cheyenne menthol flavor 100's (CMB, Cheyenne International LLC, Grover, NC, USA). Swisher and Cheyenne products were selected for testing because they make up the highest percentages of the market share of cigarillos and little cigars, based on tobacco sales data reported by the Nielsen Research Company [20]. Tobacco and wrapper from three lots of SSO, CFF and CMB, and two lots of SSC were tested in replicates of six, for a total of 132 samples (66 tobacco and 66 wrapper samples).

### DNA extraction

Total DNA was extracted from all tobacco and wrapper subsamples using the same procedures as published previously [21,22]. Briefly, each product was opened under sterile conditions, and for each little cigar and cigarillo tested, the tobacco was separated from the wrapper and processed separately. For each little cigar, 0.2g of either tobacco or wrapper was weighed out separately, and total DNA was extracted from each component separately using a protocol published previously [15,16]. DNA was further purified from the lysate using the QIAmp DSP DNA mini kit 50, v2 (Qiagen, CA) using the recommended manufacturer's protocol.

### 16S rRNA gene PCR amplification and sequencing

PCR amplification of the 16S rRNA gene and sequencing was performed using a process described previously [15,16]. Briefly, the V3V4 region of the 16S rRNA gene was amplified using 319F (ACTCCTACGGGAGGCAGCAG) and 806R (GGACTACHVGGGTWTCTAAT) universal primers barcoded for each sample that also included a linker sequence required for Illumina HiSeq 300 bp paired-ends sequencing, and a 12-bp heterogeneity spacer index sequence aimed at minimizing biases associated with low-diversity amplicon sequencing [15,16]. 50 ng of template DNA was added with Phusion High-Fidelity DNA polymerase (Thermo Fisher, USA) in a total volume of 25 $\mu$ l master mix along with an additional 0.375 $\mu$ l of Bovine Serum Albumin (BSA) (20 mg/ml, Sigma, MO, USA) as previously described [15,16]. PCR reactions using template DNA and negative controls were run under thermocycler parameters described previously [15]. Amplicons were pooled (25ng of 16S PCR amplicon from each sample) using the SequalPrep Normalization Plate Kit (Invitrogen Inc., CA, USA), and sequenced on the Illumina HiSeq (Illumina, San Diego, CA).

### Quality control and analysis of 16S rRNA gene sequences

Following sequencing, the 16S rRNA reads were initially screened for low quality and short read lengths. Screened paired reads were then assembled using PANDAseq [23], demultiplexed, and chimera trimmed using UCHIME [24] de-novo implemented in Quantitative Insights Into Microbial Ecology (QIIME; release v. 1.9) [25]. Operational Taxonomic Units (OTUs) were then clustered de-novo using VSEARCH [26] and taxonomies assigned using the SILVA database [27] (release 132) in QIIME using a minimum confidence threshold of 0.97 for taxonomic assignments. The resulting BIOM-formatted OTU table was then imported into R using RStudio (v.0.99.473). Prior to visualization with ggplot2 package [28] (v. 2.2.1) in R, sequences assigned to chloroplasts and *Cyanobacteria* were removed from further

downstream analyses, as these most likely represent sequences amplified from tobacco DNA. Alpha diversity (Observed number of species and Shannon Index) [29] was calculated on non-normalized non-rarefied and rarefied datasets, and tested for significance with the TukeyHSD test in R using phyloseq [30] (v. 1.19.1). To account for uneven sequencing depths across samples in subsequent analyses, the OTU table was normalized using MetagenomeSeq's (v. 1.16.0) cumulative sum scaling (CSS) normalization [31]. Beta diversity (principle coordinate analysis, PCoA) was calculated on Bray-Curtis distances and tested for significance with ANOSIM (999 permutations) using vegan package in R (v. 2.4–1). Significant differential abundance ( $p < 0.05$ ) between samples was determined using DESeq2 (v. 1.14.1) at  $\alpha = 0.05$  [32] on OTUs  $> 0.1\%$  abundance. A core bacterial microbiome was determined comprising OTUs present in 100% of samples and a Venn diagram was generated with limma package [33] in R to visualize these data.

## Results

### Sequencing dataset

DNA extraction was completed on 132 samples. Despite many attempts, DNA obtained from SSO wrappers could not be PCR-amplified and these 18 samples were removed from analysis. As a result, a total of 6,206,143 sequencing reads were obtained from 114 samples (66 tobacco and 48 wrapper samples), for an average number of sequences per sample of 54,439 ( $\pm 23,473$  SD). After sequencing, the minimum number of reads was 22 and the maximum was 104,223 across all samples. To ensure that samples included in the final dataset had appropriate sequence coverage, a Good's coverage cutoff of 0.9 was chosen; samples falling below this cutoff (9 tobacco SSO samples and 1 wrapper SSC sample) were removed from the analysis (Figure A in S1 File). After Good's filtering, the number of reads in the final dataset for wrapper samples ranged from 27,799 to 82,704 per sample, while the numbers of reads for tobacco samples ranged from 8,876 to 104,223 per sample.

Overall, sequences were clustered into 4,460 OTUs (97% identity) across all 104 samples: 2,689 OTUs from 57 tobacco samples, and 3,305 OTUs from 47 wrapper samples. After clean up (removing reads assigned to taxa '*Cyanobacteria*' and OTUs with less than 10 reads), the total number of sequences used in downstream analyses was 5,540,948 from 104 samples, clustered into 2,681 OTUs.

### Microbiota differences between tobacco and wrapper samples

Differences in sequence coverage between samples can significantly affect measures of alpha diversity, and therefore, alpha diversity metrics (Shannon diversity and Observed species) were calculated on both rarefied (after down-sampling each sample to 7,964 reads) (Fig 1A) and non-rarefied data (Figure B in S1 File). Because analyses of rarefied and non-rarefied datasets yielded similar alpha-diversity results, only rarefied analyses are presented in Fig 1A and 1B. For both richness (Observed) and diversity (Shannon) metrics, bacterial communities from tobacco samples (Observed: 294.5  $\pm$  135.1; Shannon: 3.90  $\pm$  0.41) were significantly different ( $p < 0.005$ ) compared to those from wrapper samples (Observed: 295.0  $\pm$  54.2; Shannon: 3.20  $\pm$  0.30). Similarly, beta diversity analyses (Fig 1C) indicated that sample type (tobacco or wrapper) explained 96.7% (ANOSIM,  $p < 0.005$ ) of the variability observed in the bacterial communities, providing additional evidence that the bacterial microbiota of the tobacco samples is significantly different from that of the wrapper samples.

The top five bacterial phyla identified across all brands, lots and sample types (tobacco and wrapper) were *Firmicutes*, *Proteobacteria*, *Actinobacteria*, *Bacteroidetes* and *Chlorobi*. The tobacco samples were dominated by *Proteobacteria* compared to the wrapper samples.

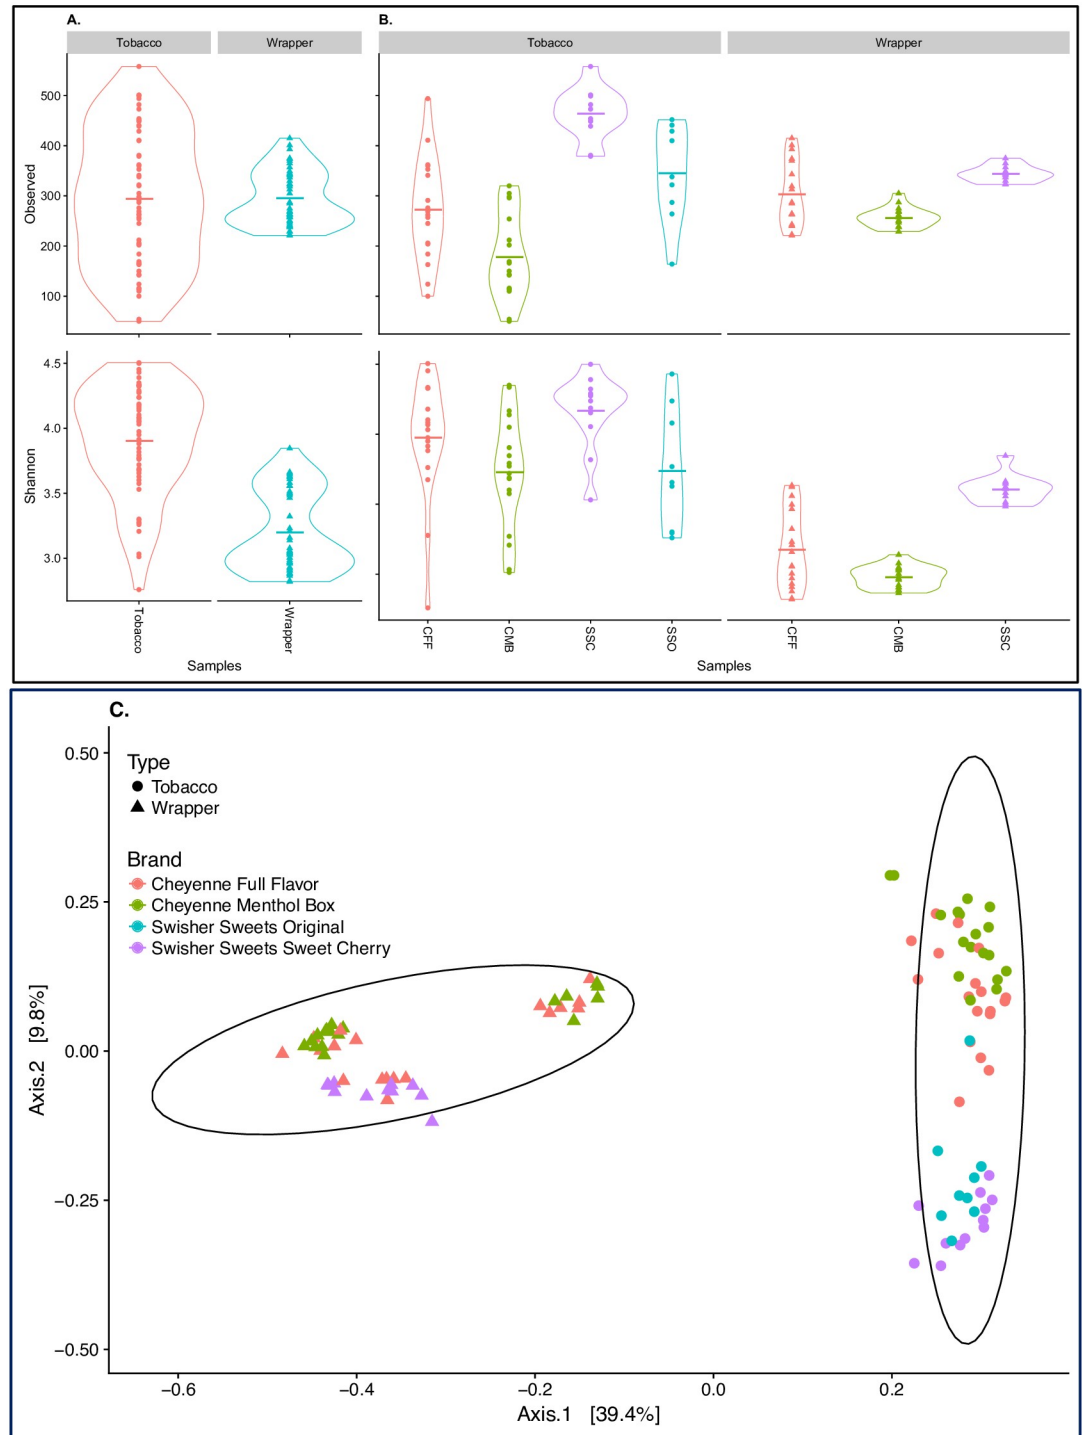

**Fig 1. Bacterial diversity between tobacco and wrapper samples.** Violin plots showing alpha diversity (Observed number of species and Shannon Index) [A] across all samples using rarefied data to minimum sampling depth (red, tobacco; and blue, wrappers); and [B] by product (red, Cheyenne Full Flavor (CFF); green, Cheyenne Menthol Box (CMB); purple, Swisher sweets cherry (SSC); and blue, Swisher sweets original (SSO)). [C] PCoA analysis plots of Bray-Curtis computed distances between tobacco products. Sample type is denoted by shapes: triangle, wrapper; and circle, tobacco. Ellipses are drawn at 95% confidence intervals for product brand.

<https://doi.org/10.1371/journal.pone.0211705.g001>

Specifically, the average relative abundance of *Proteobacteria* was 48.2% (SD: +/- 0.2; min: 27%; max: 71%) and 13.0% (SD: +/- 0.04; min: 10%; max: 17%) in tobacco and wrapper samples, respectively. In contrast, wrappers were dominated by *Firmicutes* at an average relative abundance of 83.9% (SD: +/- 0.6; min: 76%; max: 87%), compared to 39.8% (SD: +/- 0.15; min: 22%; max: 58%) in tobacco. The relative abundance of *Actinobacteria* was higher in tobacco, 10.6% (SD: +/- 0.06; min: 3%; max: 17%), when compared to that in wrappers, 0.6% (+/- 0). *Bacteroidetes* was found at a relative abundance of less than 3% in both tobacco and wrappers.

In total, 2,035 OTUs were classified to the genus level, and among those, only 202 were identified to the species level. The top genera identified across all samples were *Bacillus*, *Lactobacillus*, *Staphylococcus*, *Pseudomonas*, *Pseudoxanthomonas*, *Clostridium*, *Corynebacterium*, *Lentibacillus*, *Pantoea* (Fig 2A). *Bacillus* and *Lactobacillus* dominated in the wrappers, while tobacco was dominated by *Pseudomonas* and *Staphylococcus* (Fig 2A). Differential abundances were also recorded for other bacterial genera, and those that were significantly different

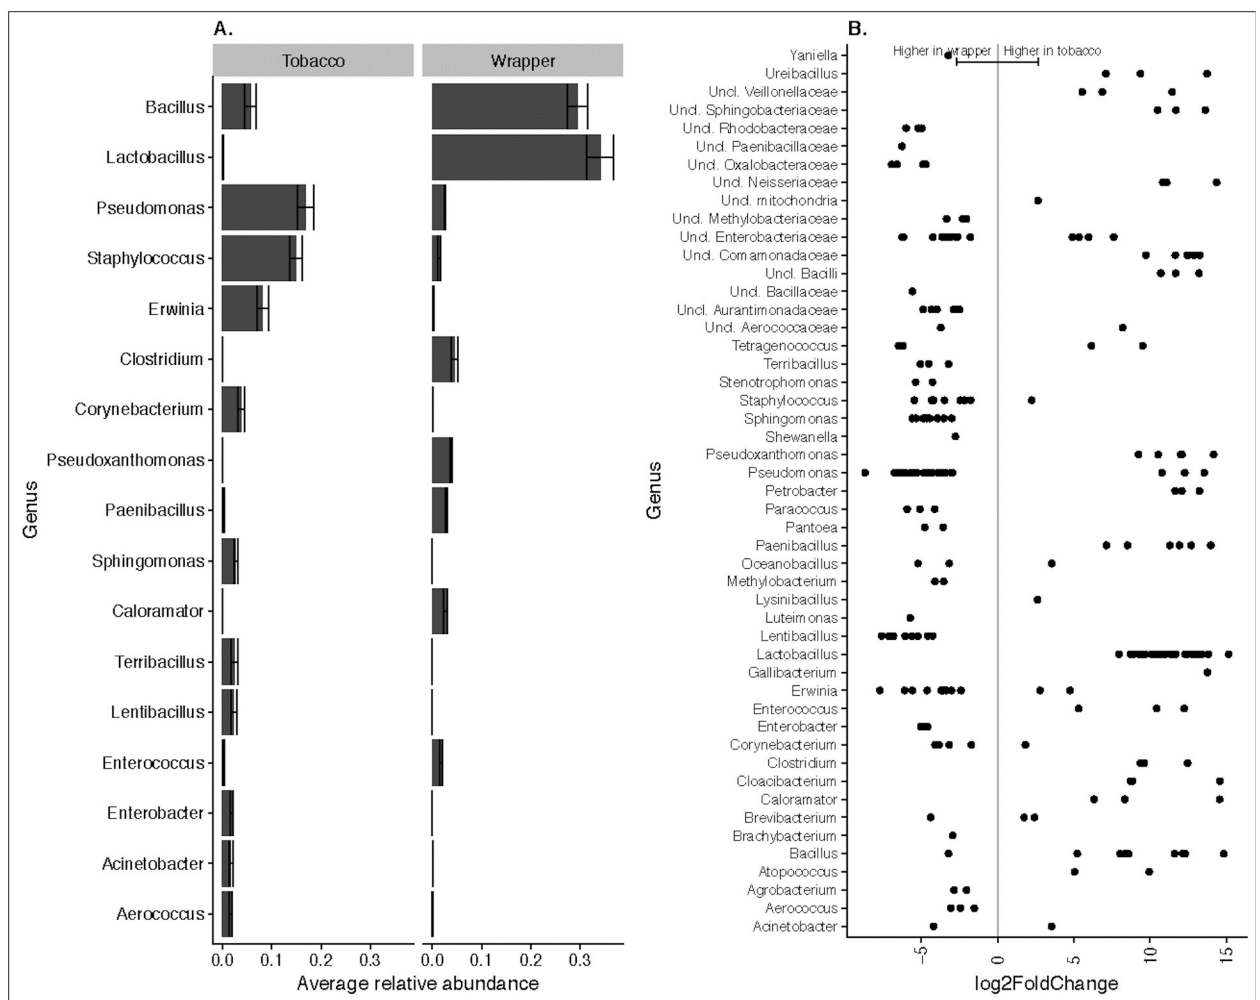

**Fig 2. Overview of bacterial genera present in tobacco and wrappers.** [A] Relative abundance of top 20 bacterial genera present in tobacco and wrapper samples. [B] Differential abundances of bacterial genera that were statistically significantly different ( $p < 0.05$ ) between tobacco and wrapper samples. A positive log<sub>2</sub>-fold change value denotes an OTU that is significantly higher in tobacco, while a negative log<sub>2</sub>-fold change indicates an OTU that is significantly higher in wrapper. The grey line and arrows highlight the conversion in log<sub>2</sub>-fold change from negative to positive values.

<https://doi.org/10.1371/journal.pone.0211705.g002>

between tobacco and wrapper samples are shown in Fig 2B. At the species level, tobacco samples were characterized by a higher relative abundance of *Pantoea agglomerans*, *Shewanella algae*, *Bacillus clausii*, *Bacillus coagulans*, *Erwinia dispersa*, *Staphylococcus equorum*, *Tetragenococcus halophilus*, *Pseudomonas pseudoalcaligenes*, *Acinetobacter rhizosphaerae*, *Acinetobacter schindleri*, *Staphylococcus sciuri*, *Corynebacterium stationis*, and *Pseudomonas viridiflava*. Wrapper samples had a higher relative abundance of *Pseudomonas thermotolerans*, *Bacillus thermoamylovorans*, *Pseudoxanthomonas taiwanensis*, *Atopococcus tabaci*, *Petrobacter succinatimandens*, *Lactobacillus salivarius*, *Paenibacillus barengoltzii*, *Enterococcus cecorum*, and *Lactobacillus agilis*. The relative abundance of the top 100 species-level taxonomic assignments, across brands and sample types, is shown in S1 Table.

Despite these major differences in bacterial composition between little cigar tobacco and wrappers, a core microbiome analysis identified 68 OTUs that were present in all tobacco and wrapper samples. Within those, 8 OTUs (OTU# 2348- Firmicutes, OTU# 3747- Bacillales, OTU# 4279- *Paenibacillus* sp., OTU# 4318- Bacillales, OTU# 4667- *Pseudomonas thermotolerans*, OTU# 4897- Bacilli, OTU# 6365- *Pseudoxanthomonas taiwanensis*, OTU#6505- *Bacillus thermoamylovorans*) were identified as biomarkers for little cigar wrapper bacterial communities, i.e. only found in the wrapper samples and absent in the little cigar tobacco, while there weren't any such OTUs exclusively present in the tobacco samples (Figure C in S1 File).

### Microbiota differences between brands

Overall, brand had a significant effect ( $p < 0.005$ ) on both the Shannon diversity metric and observed number of species. Observed number of species was higher in CFF and CMB wrappers compared to CFF and CMB tobacco, but lower in SSC wrappers compared to SSC tobacco (Fig 1B). Similarly, PCoA ordination showed significant differences in bacterial communities by brand (ANOSIM  $R = 0.138$ ,  $p < 0.001$ ) and lot (ANOSIM  $R = 0.134$ ,  $p < 0.001$ ). Overall, the Cheyenne products cluster separately from the Swisher Sweets products (Fig 1C). Within each brand, the three lots showed significantly different bacterial communities in the wrapper samples (ANOSIM  $R = 0.134$ ,  $p < 0.001$ ), while they overlapped in the tobacco samples (Fig 3). UniFrac distances were used to measure the beta diversity between brands and sample type (Figure D in S1 File).

A comparison between brands showed that the relative abundance of *Actinobacteria* (SSO: 12.4% +/- 0.08; SSC: 12% +/- 0.11) and *Firmicutes* (SSO: 60.7% +/- 0.10; SSC: 58.3% +/- 0.19) was higher in Swisher Sweets tobacco compared to Cheyenne tobacco (*Actinobacteria*: CFF 8.1% +/- 0.01; CMB: 3.3% +/- 0.0 and *Firmicutes*: CFF: 31.1.4% +/- 0.06; CMB: 29.9% +/- 0.0). While a lower relative abundance of *Bacteroidetes* (SSO: 0.2% +/- 0.0; SSC: 2.1% +/- 0.02) and *Proteobacteria* (SSO: 26.7.4% +/- 0.06; SSC: 27.6% +/- 0.12) was found in Swisher Sweets tobacco compared to Cheyenne tobacco (*Bacteroidetes*-CFF: 1.7% +/- 0.01; CMB: 1.9% +/- 0.01 and *Proteobacteria*- CFF: 59.1.4% +/- 0.06; CMB: 71.9% +/- 0.01).

At the genus level, differences were also observed across brand (Fig 4). For instance, the average relative abundance of *Bacillus* in wrappers ranged from 16.8% in SSC to 35.8% in CMB, while in tobacco, average relative abundance of *Bacillus* was only 5.4% in CFF, 3.7% in CMB, 2.7% in SSC and 14.6% in SSO. Specifically, 30% of the *Bacillus* OTUs were assigned to *B. thermoamylovorans*, a spore-forming bacterium that possesses high-level heat resistance [34] and has been linked to food spoilage, particularly in the dairy industry.

Comparing only tobacco samples, a statistically significantly lower relative abundance of the bacterial genera *Brachybacterium*, *Corynebacterium*, *Bacillus*, *Lactobacillus* and *Ureibacillus* was found in CMB when compared to CFF (Fig 5A). Comparison of tobacco bacterial communities from SSO and SSC showed a statistically significantly ( $p < 0.001$ ) higher relative

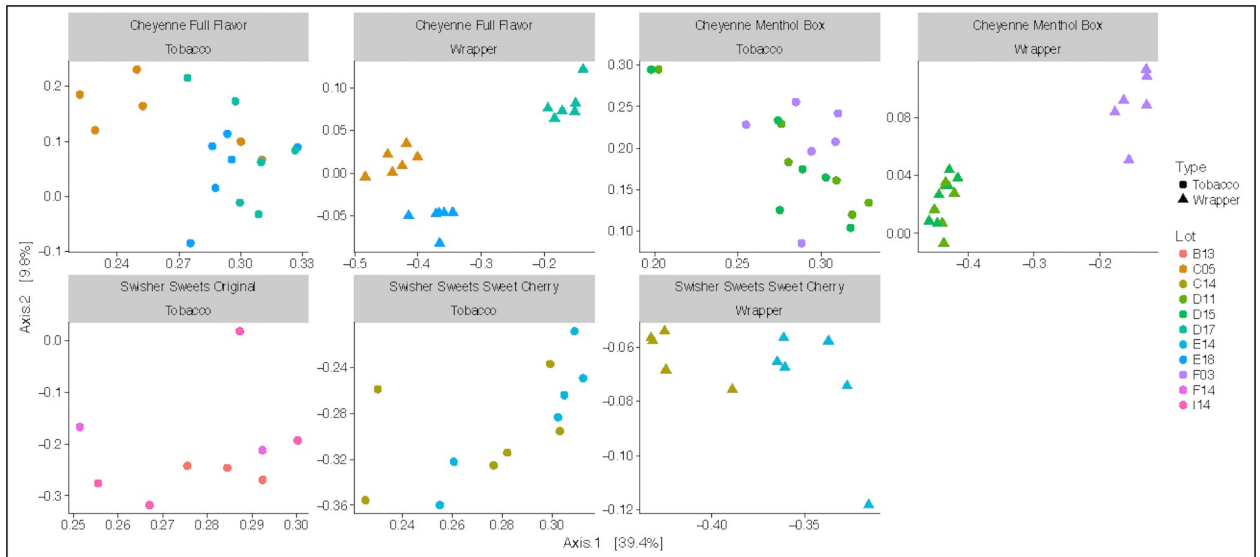

**Fig 3. Microbial diversity between lots of different brands.** PCoA analysis plots of Bray- Curtis computed distances between the lots of each brand and type. Type of product is denoted by shapes: triangle- wrapper and circle- tobacco. Colors denote the different lot numbers within each brand.

<https://doi.org/10.1371/journal.pone.0211705.g003>

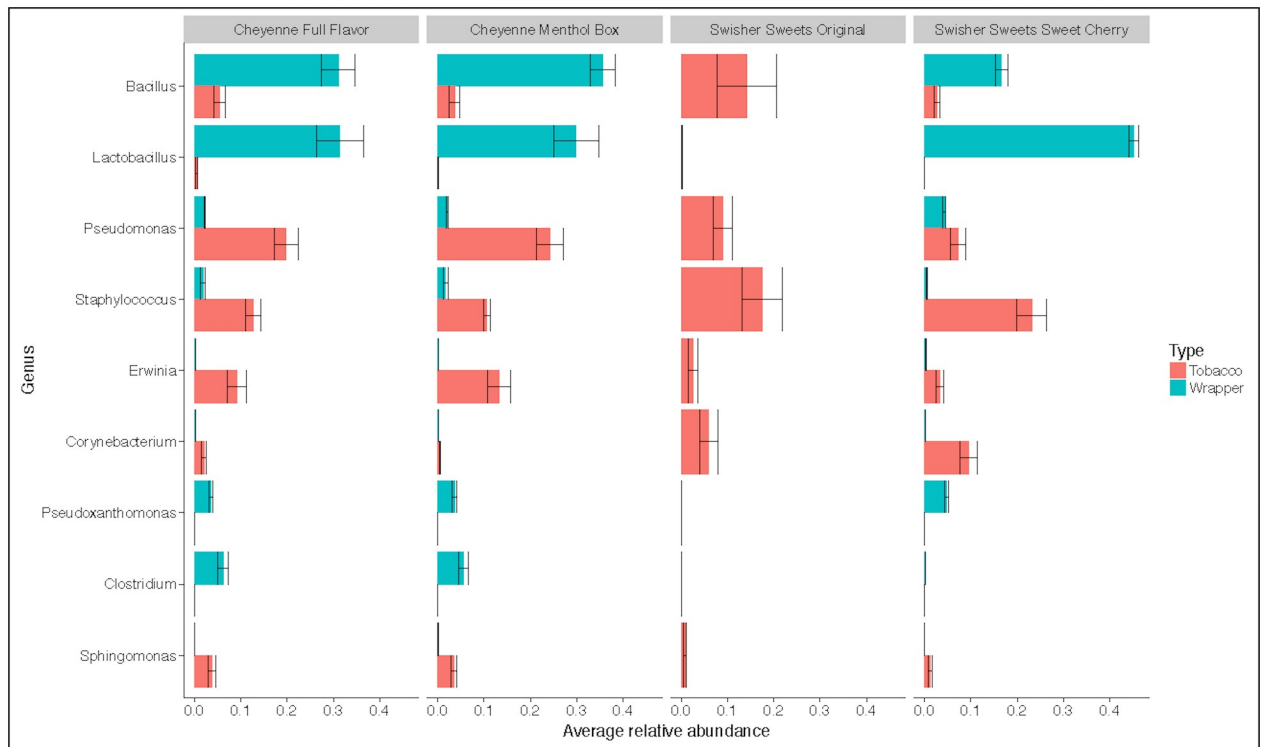

**Fig 4. Box plots showing the top 10 bacterial genera that were found among all the four brands.** Colors denotes the type of products: red- tobacco and blue- wrapper.

<https://doi.org/10.1371/journal.pone.0211705.g004>



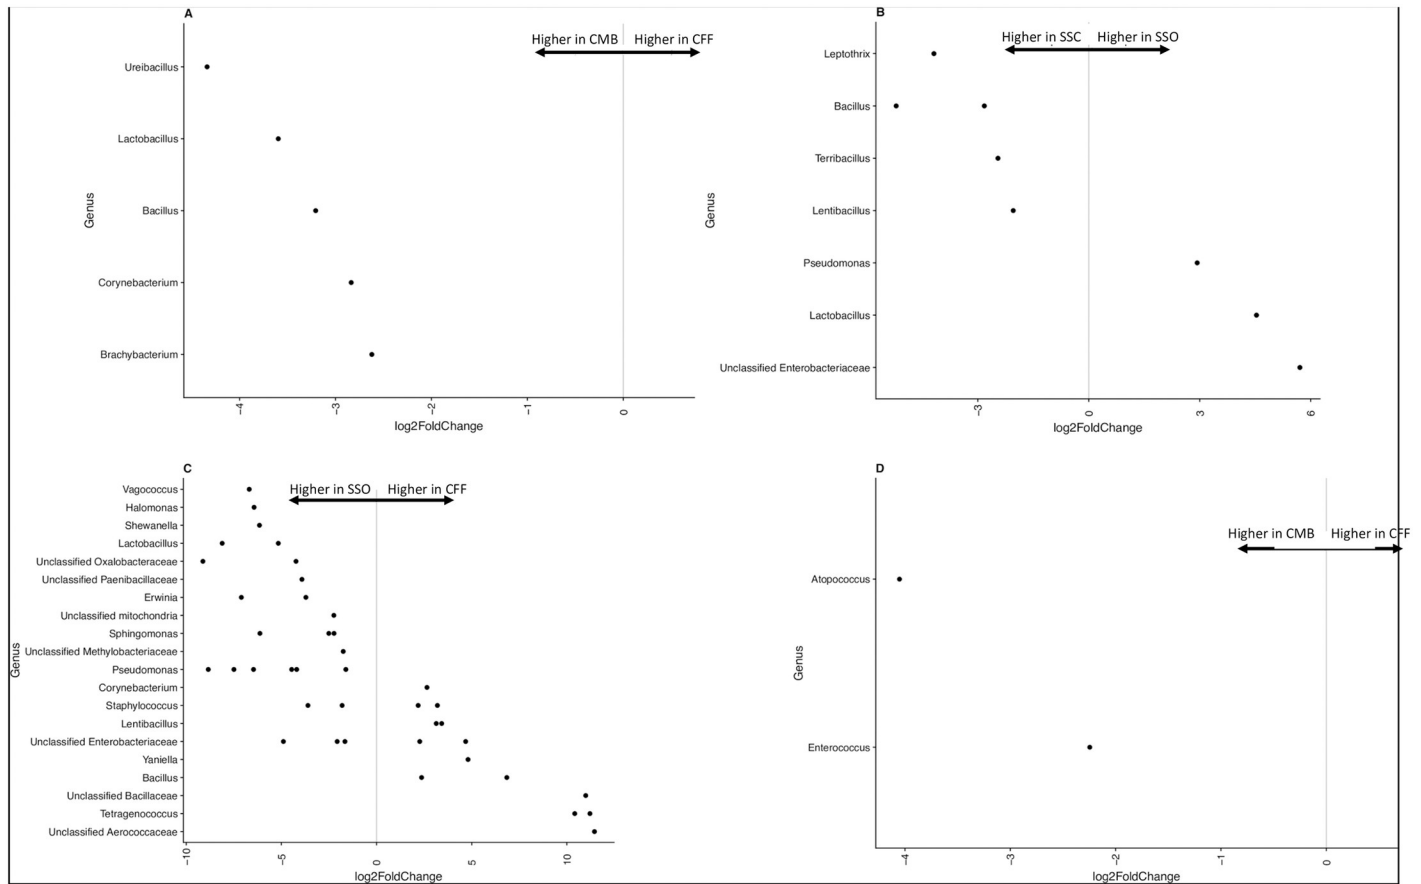

**Fig 5. Differential abundance plots of bacterial genera that were statistically significantly different ( $p < 0.05$ ) between the brands.** The bacterial OTUs that could not be assigned to a genus are represented as “Unclassified” and are assigned to their family level. The grey line and arrows highlight the conversion in log<sub>2</sub>-fold change from negative to positive values. [A] Comparing Cheyenne Menthol Box (CMB) to Cheyenne Full Flavor (CFF) tobacco samples. A positive log<sub>2</sub>-fold change value denotes an OTU that is significantly higher in CFF, while a negative log<sub>2</sub>-fold change indicates an OTU that is significantly higher in CMB. [B] Comparing Swisher sweets cherry (SSC) to Swisher sweets original (SSO) tobacco samples. A positive log<sub>2</sub>-fold change value denotes an OTU that is significantly higher in SSO, while a negative log<sub>2</sub>-fold change indicates an OTU that is significantly higher in SSC. [C] Comparing Swisher sweets original (SSO) to Cheyenne Full Flavor (CFF) tobacco samples. A positive log<sub>2</sub>-fold change value denotes an OTU that is significantly higher in CFF, while a negative log<sub>2</sub>-fold change indicates an OTU that is significantly higher in SSO. [D] Comparing Cheyenne Menthol Box (CMB) to Cheyenne Full Flavor (CFF) wrapper samples. A positive log<sub>2</sub>-fold change value denotes an OTU that is significantly higher in CFF, while a negative log<sub>2</sub>-fold change indicates an OTU that is significantly higher in CMB.

<https://doi.org/10.1371/journal.pone.0211705.g005>

abundance of *Lactobacillus* and *Pseudomonas* in SSO, and a lower relative abundance of *Lentibacillus*, *Terribacillus*, *Bacillus* and *Leptothrix* in SSC (Fig 5B). Comparing between tobacco samples from SSO and CFF, *Corynebacterium*, *Lentibacillus*, *Yaniella*, *Bacillus* and *Tetragenococcus* were found to be at a significantly higher relative abundance in CFF samples (Fig 5C). While comparing wrapper samples, a lower relative abundance of *Enterococcus* and *Atopococcus* was seen in CMB compared to CFF (Fig 5D).

## Discussion

This study provides novel evidence that the bacterial communities of little cigars and cigarillos are not only diverse, but also differ significantly between the tobacco and the wrapper, and across brands. During the manufacturing process of a general cigar, different types of leaves are used for making the wrapper, filler and binder. These leaves may be grown in multiple regions of the world, under differing soil and climatic conditions [35]. This manufacturing

process, along with differences in the composition of the materials within the tobacco versus the wrapper, likely contributed to the observed variability between these sample types. Tobacco samples also differed in bacterial community composition across brands, which is not unexpected considering that brands are manufactured under different industrial conditions with variable tobacco blends [36]. This can also have an effect on the individual lots that are manufactured, resulting in the variable bacterial community composition that we observed in wrapper samples across lots in this study.

Interestingly, a significantly higher abundance of the bacterial genera *Lentibacillus* spp., *Terribacillus* spp., *Bacillus* spp. and *Leptothrix* spp. was found in the Swisher Sweets Cherry tobacco samples when compared to Swisher Sweets Original tobacco samples. The predominance of these four genera in the flavored little cigars may be due to the effect of flavoring of the product itself. Even though hundreds of flavors of little cigars are available on the market, not much is known about the chemical constituents of the flavoring additives and their associated impacts on tobacco microbiology and human health. In contrast, a few studies have evaluated the chemicals used to flavor electronic cigarettes including diacetyl and acetyl propionyl, two chemicals that are known to cause bronchiolitis obliterans [37–39]. In September 2009, FDA banned the use of flavoring (other than menthol) in cigarettes in an effort to discourage smoking in the US (particularly among youth and young adults), but this was not imposed on other tobacco products like little cigars and electronic cigarettes. In the present study, mentholated little cigars (CMB) were characterized by a significantly higher abundance of *Brachybacillus* spp., *Corynebacterium* spp., *Bacillus* spp., *Lactobacillus* spp., *Ureibacillus* spp., *Enterococcus* spp. and *Atopococcus* spp. when compared to non-mentholated little cigars (CFF). Menthol has antimicrobial properties and the presence of this flavor may have directly shifted the bacterial communities within the mentholated products [16]. Mentholation of cigarettes also has been shown to pose a greater threat in causing cancers and other respiratory diseases when compared to non-mentholated cigarettes [40,41]. The relationship between mentholation, modification of little cigar bacterial community composition and their potential synergism in the development of adverse health effects among users of these products is an area of future exploration.

Future work focusing on the potential human health effects associated with bacterial pathogens identified in the tested little cigar products is also warranted. Here, we identified several potential pathogens in tested products. For instance, *Pseudomonas pseudoalcaligenes* and *Staphylococcus sciuri* were detected at a high relative abundance in little cigar tobacco samples. Previous studies have shown that *P. pseudoalcaligenes* is a potential causative agent of human infections [42], including peritonitis (inflammation of the inner wall of the abdomen) [43] and *S. sciuri* is an emerging human pathogen causing endocarditis [44], urinary tract infections [45], pelvic inflammatory diseases [46], wound infections [47] and septic shock [48]. *Pantoea agglomerans*, *Shewanella algae* and *Acinetobacter schindleri* were also found at a higher relative abundance in tobacco samples compared to wrapper samples. *P. agglomerans* is a known pathogen causing bone joint, blood and soft tissue infections [49], and a Danish study isolated *S. algae* from 67 ear infection cases [50]. *Acinetobacter* spp. are commonly isolated from hospital environments [51] and *A. schindleri* is regarded as an opportunistic pathogen [52].

Among the other bacterial species identified in little cigar products that may be relevant to users' health, *Lactobacillus salivarius* and *L. agilis* were found at a significantly higher abundance in the tobacco samples from Swisher Sweets Original and Cheyenne Menthol Box. Even though infections with *L. salivarius* are uncommon, this organism was found to be the causative agent for diabetic ketoacidosis accompanied by bacteremia, emphysema and respiratory failure in one reported case [53]. In addition, wrapper samples from Cheyenne Full Flavor had

a significantly higher relative abundance of *Enterococcus cecorum*. *E. cecorum* has been previously shown to be associated with bacteremic peritonitis in humans [54].

Nevertheless, in order for potential pathogens present in little cigars to impact the health of users, these microorganisms would first have to survive the combustion process and then be transferred to the upper respiratory system via mainstream smoke. While the tip of combustible tobacco products (the combustion zone) can reach up to 900°C, immediately downstream of the combustion zone is the “cooler pyrolysis/distillation zone” where the majority of chemical constituents in smoke are generated [55] and “the temperature of the aerosol drops rapidly to slightly above room temperature as it travels down the tobacco rod,” [56]. This area correlates with the portion of the product that is held between fingers to the portion that is inserted into the mouth, all of which remain at temperatures that are comfortable to the touch, comfortable to inhale and could accommodate live bacteria. Larsson et al. (2008) showed that the mainstream smoke of cigarette tobacco that was spiked with *Escherichia coli* cells had a 4-fold higher concentration of lipopolysaccharides (a key component of the outer membranes of gram-negative bacteria) compared to that of cigarette tobacco that was not spiked [57,58]. Pauly et al. (2010) demonstrated that differing microbial constituents, including lipopolysaccharides, of tobacco eluates activated human lung macrophage, producing pro-inflammatory factors such as IL-8. These data suggest that bacterial constituents may be transferred to users via mainstream smoke, and that “lung inflammation of long-term smokers may be attributed in part to tobacco-associated bacterial and fungal components that have been identified in tobacco and tobacco smoke” [58]. Moreover, ongoing culture-based experiments in our lab are providing the first evidence that viable bacteria can survive the combustion process and be recovered from cigarette mainstream smoke (data not shown). Additional studies are necessary to further explore whether viable microorganisms inhaled within mainstream smoke are able to colonize the upper respiratory tracts of users, contribute to lung inflammation, and potentially influence health outcomes.

In summary, our findings suggest that the bacterial microbiota of little cigar tobacco and wrappers is diverse and distinct, and bacterial communities vary across brands. Strengths of this study include the sample size, the ability to demonstrate replication of findings across biological replicates and thorough statistical analysis of the sequencing data. As with all 16S rRNA-based sequencing studies, this study had limitations, including inherent PCR amplification biases, our limited ability to assign species-level classifications, our inability to discriminate between the live/active and dead proportions of the detected bacterial communities, and the lack of data regarding viability of detected bacteria. However, previous work demonstrates that bacteria can be cultured from smokeless tobacco products [18], therefore, it is likely that the same would be true for little cigars and cigarillos. One additional limitation is that this study included samples from one time point only, providing only a snapshot of the bacterial communities present in the tested products. Longitudinal studies of these products placed under different storage conditions are ongoing in our group and will provide insights into whether these bacterial communities are dynamic, changing in the period of time between the sale and use of these products. Finally, future studies that include functional analyses, in addition to taxonomic data, would further our overall understanding of the microbiota of little cigars and cigarillos.

## Supporting information

**S1 File. Figure A. Good’s Coverage across all tobacco and wrapper samples. Figure B. Alpha diversity within tobacco and wrapper samples (generated with non-rarefied data) measured using Observed OTUs and the Shannon Index. Color denotes product brand:**

Cheyenne full flavor 100's (CFF), red; Cheyenne menthol flavor 100's (CMB), green; Swisher sweets little cigars sweet cherry flavor (SSC), purple; and Swisher sweets cigarillo natural sweet (SSO), blue. **Figure C. Core microbiome analysis indicating the number of observed taxonomic units (OTUs) shared between tobacco and wrapper samples. Figure D. Principle coordinate analysis (PCoA) using unweighted Unifrac distances.** Tobacco samples are represented by circles, and wrapper samples are represented by triangles. Differing colors denote the various lots tested.

(DOCX)

**S1 Table. Relative abundance of top 100 bacterial species identified across all brands and type of tobacco products.**

(XLSX)

## Author Contributions

**Conceptualization:** Prachi Kulkarni, Pamela I. Clark, Emmanuel F. Mongodin, Amy R. Sapkota.

**Formal analysis:** Suhana Chattopadhyay, Eoghan M. Smyth, Emmanuel F. Mongodin, Amy R. Sapkota.

**Funding acquisition:** Pamela I. Clark, Emmanuel F. Mongodin, Amy R. Sapkota.

**Investigation:** Prachi Kulkarni, Kelsey R. Babik, Molly Reid, Lauren E. Hittle.

**Methodology:** Prachi Kulkarni, Kelsey R. Babik, Molly Reid, Emmanuel F. Mongodin, Amy R. Sapkota.

**Project administration:** Amy R. Sapkota.

**Resources:** Emmanuel F. Mongodin, Amy R. Sapkota.

**Supervision:** Emmanuel F. Mongodin, Amy R. Sapkota.

**Visualization:** Suhana Chattopadhyay, Eoghan M. Smyth.

**Writing – original draft:** Suhana Chattopadhyay, Prachi Kulkarni, Kelsey R. Babik, Molly Reid.

**Writing – review & editing:** Eoghan M. Smyth, Prachi Kulkarni, Kelsey R. Babik, Molly Reid, Lauren E. Hittle, Pamela I. Clark, Emmanuel F. Mongodin, Amy R. Sapkota.

## References

1. O'Connor RJ. Non-cigarette tobacco products: what have we learnt and where are we headed? *Tob Control*. 2012 Mar; 21(2):181–90. <https://doi.org/10.1136/tobaccocontrol-2011-050281> PMID: 22345243
2. Milam AJ, Bone L, Furr-Holden D, Coylewright M, Dachille K, Owings K, et al. Mobilizing for Policy: Using Community-Based Participatory Research to Impose Minimum Packaging Requirements on Small Cigars. *Prog Community Health Partnersh Res Educ Action*. 2012; 6(2):205–12.
3. Cullen J, Mowery P, Delnevo C, Allen JA, Sokol N, Byron MJ, et al. Seven-Year Patterns in US Cigar Use Epidemiology Among Young Adults Aged 18–25 Years: A Focus on Race/Ethnicity and Brand. *Am J Public Health*. 2011 Oct; 101(10):1955–62. <https://doi.org/10.2105/AJPH.2011.300209>
4. Delnevo CD, Hrywna M, Foulds J, Steinberg MB. Cigar use before and after a cigarette excise tax increase in New Jersey. *Addict Behav*. 2004 Dec; 29(9):1799–807. <https://doi.org/10.1016/j.addbeh.2004.04.024> PMID: 15530722
5. Cantrell J, Kreslake JM, Ganz O, Pearson JL, Vallone D, Anesetti-Rothermel A, et al. Marketing Little Cigars and Cigarillos: Advertising, Price, and Associations With Neighborhood Demographics. *Am J*

- Public Health. 2013 Aug 15; 103(10):1902–9. <https://doi.org/10.2105/AJPH.2013.301362> PMID: 23948008
6. Kostygina G, Tran H, Shi Y, Kim Y, Emery S. 'Sweeter Than a Swisher': amount and themes of little cigar and cigarillo content on Twitter. *Tob Control*. 2016 Oct; 25(Suppl 1):i75–82. <https://doi.org/10.1136/tobaccocontrol-2016-053094>
  7. Schuster RM, Hertel AW, Mermelstein R. Cigar, Cigarillo, and Little Cigar Use Among Current Cigarette-Smoking Adolescents. *Nicotine Tob Res*. 2013 May 1; 15(5):925–31. <https://doi.org/10.1093/ntr/nts222> PMID: 23072873
  8. Gammon DG, Loomis BR, Dench DL, King BA, Fulmer EB, Rogers T. Effect of price changes in little cigars and cigarettes on little cigar sales: USA, Q4 2011–Q4 2013. *Tob Control*. 2016 Sep; 25(5):538–44. <https://doi.org/10.1136/tobaccocontrol-2015-052343>
  9. Richardson A, Rath J, Ganz O, Xiao H, Vallone D. Primary and Dual Users of Little Cigars/Cigarillos and Large Cigars: Demographic and Tobacco Use Profiles. *Nicotine Tob Res*. 2013 Oct 1; 15(10):1729–36. <https://doi.org/10.1093/ntr/ntt053> PMID: 23645607
  10. Baker F, Ainsworth SR, Dye JT, Crammer C, Thun MJ, Hoffmann D, et al. Health Risks Associated With Cigar Smoking. *JAMA*. 2000 Aug 9; 284(6):735–40. PMID: 10927783
  11. Shapiro JA, Jacobs EJ, Thun MJ. Cigar Smoking in Men and Risk of Death From Tobacco-Related Cancers. *JNCI J Natl Cancer Inst*. 2000 Feb 16; 92(4):333–7. PMID: 10675383
  12. Boffetta P, Pershagen G, Jöckel KH, Forastiere F, Gaborieau V, Heinrich J, et al. Cigar and pipe smoking and lung cancer risk: a multicenter study from Europe. *J Natl Cancer Inst*. 1999 Apr 21; 91(8):697–701. PMID: 10218507
  13. Iribarren C, Tekawa IS, Sidney S, Friedman GD. Effect of Cigar Smoking on the Risk of Cardiovascular Disease, Chronic Obstructive Pulmonary Disease, and Cancer in Men. *N Engl J Med*. 1999 Jun 10; 340(23):1773–80. <https://doi.org/10.1056/NEJM199906103402301> PMID: 10362820
  14. Henningfield JE, Fant RV, Radzius A, Frost S. Nicotine concentration, smoke pH and whole tobacco aqueous pH of some cigar brands and types popular in the United States. *Nicotine Tob Res Off J Soc Res Nicotine Tob*. 1999 Jun; 1(2):163–8.
  15. Chopyk J, Chattopadhyay S, Kulkarni P, Smyth EM, Hittle LE, Paulson JN, et al. Temporal Variations in Cigarette Tobacco Bacterial Community Composition and Tobacco-Specific Nitrosamine Content Are Influenced by Brand and Storage Conditions. *Front Microbiol* [Internet]. 2017 Mar 7 [cited 2017 Dec 18];08. Available from: <http://journal.frontiersin.org/article/10.3389/fmicb.2017.00358/full>
  16. Chopyk J, Chattopadhyay S, Kulkarni P, Claye E, Babik KR, Reid MC, et al. Mentholation affects the cigarette microbiota by selecting for bacteria resistant to harsh environmental conditions and selecting against potential bacterial pathogens. *Microbiome* [Internet]. 2017 Dec [cited 2017 Dec 18]; 5(1). Available from: <http://microbiomejournal.biomedcentral.com/articles/10.1186/s40168-017-0235-0>
  17. Sapkota AR, Berger S, Vogel TM. Human Pathogens Abundant in the Bacterial Metagenome of Cigarettes. *Environ Health Perspect*. 2009 Oct 22; 118(3):351–6. <https://doi.org/10.1289/ehp.0901201> PMID: 20064769
  18. Smyth EM, Kulkarni P, Claye E, Stanfill S, Tyx R, Maddox C, et al. Smokeless tobacco products harbor diverse bacterial microbiota that differ across products and brands. *Appl Microbiol Biotechnol*. 2017 Jul; 101(13):5391–403. <https://doi.org/10.1007/s00253-017-8282-9> PMID: 28432442
  19. Tyx RE, Stanfill SB, Keong LM, Rivera AJ, Satten GA, Watson CH. Characterization of Bacterial Communities in Selected Smokeless Tobacco Products Using 16S rDNA Analysis. *PLoS One*. 2016; 11(1):e0146939. <https://doi.org/10.1371/journal.pone.0146939> PMID: 26784944
  20. Wang TW, Falvey K, Gammon DG, Loomis BR, Kuiper NM, Rogers T, et al. Sales Trends in Price-Discounted Cigarettes, Large Cigars, Little Cigars, and Cigarillos—United States, 2011–2016. *Nicotine Tob Res*. 2018 Sep 25; 20(11):1401–6. <https://doi.org/10.1093/ntr/ntx249>
  21. Jackson HT, Mongodin EF, Davenport KP, Fraser CM, Sandler AD, Zeichner SL. Culture-Independent Evaluation of the Appendix and Rectum Microbiomes in Children with and without Appendicitis. *Parades-Sabja D, editor. PLoS ONE*. 2014 Apr 23; 9(4):e95414. <https://doi.org/10.1371/journal.pone.0095414> PMID: 24759879
  22. Zupancic ML, Cantarel BL, Liu Z, Drabek EF, Ryan KA, Cirimotich S, et al. Analysis of the Gut Microbiota in the Old Order Amish and Its Relation to the Metabolic Syndrome. *Thameem F, editor. PLoS ONE*. 2012 Aug 15; 7(8):e43052. <https://doi.org/10.1371/journal.pone.0043052> PMID: 22905200
  23. Masella AP, Bartram AK, Truszkowski JM, Brown DG, Neufeld JD. PANDAseq: paired-end assembler for illumina sequences. *BMC Bioinformatics*. 2012; 13(1):31.
  24. Edgar RC, Haas BJ, Clemente JC, Quince C, Knight R. UCHIME improves sensitivity and speed of chimera detection. *Bioinformatics*. 2011 Aug 15; 27(16):2194–200. <https://doi.org/10.1093/bioinformatics/btr381> PMID: 21700674

25. Caporaso JG, Kuczynski J, Stombaugh J, Bittinger K, Bushman FD, Costello EK, et al. QIIME allows analysis of high-throughput community sequencing data. *Nat Methods*. 2010 May; 7(5):335–6. <https://doi.org/10.1038/nmeth.f.303> PMID: 20383131
26. Rognes T, Flouri T, Nichols B, Quince C, Mahé F. VSEARCH: a versatile open source tool for metagenomics. *PeerJ*. 2016 Oct 18; 4:e2584. <https://doi.org/10.7717/peerj.2584> PMID: 27781170
27. Quast C, Pruesse E, Yilmaz P, Gerken J, Schweer T, Yarza P, et al. The SILVA ribosomal RNA gene database project: improved data processing and web-based tools. *Nucleic Acids Res*. 2013 Jan; 41(Database issue):D590–6. <https://doi.org/10.1093/nar/gks1219> PMID: 23193283
28. Clarke KR, Warwick RM (1994).pdf.
29. Shannon TR, Wang F, Puglisi J, Weber C, Bers DM. A Mathematical Treatment of Integrated Ca Dynamics within the Ventricular Myocyte. *Biophys J*. 2004 Nov; 87(5):3351–71. <https://doi.org/10.1529/biophysj.104.047449> PMID: 15347581
30. McMurdie PJ, Holmes S. phyloseq: An R Package for Reproducible Interactive Analysis and Graphics of Microbiome Census Data. *PLOS ONE*. 2013 Apr 22; 8(4):e61217. <https://doi.org/10.1371/journal.pone.0061217> PMID: 23630581
31. Paulson JN, Stine OC, Bravo HC, Pop M. Robust methods for differential abundance analysis in marker gene surveys. *Nat Methods*. 2013 Dec; 10(12):1200–2. <https://doi.org/10.1038/nmeth.2658> PMID: 24076764
32. Love MI, Huber W, Anders S. Moderated estimation of fold change and dispersion for RNA-seq data with DESeq2. 2014 Nov 17;
33. Ritchie ME, Phipson B, Wu D, Hu Y, Law CW, Shi W, et al. limma powers differential expression analyses for RNA-sequencing and microarray studies. *Nucleic Acids Res*. 2015 Apr 20; 43(7):e47–e47. <https://doi.org/10.1093/nar/gkv007> PMID: 25605792
34. Berendsen EM, Krawczyk AO, Klaus V, de Jong A, Boekhorst J, Eijlander RT, et al. *Bacillus thermoamylovorans* Spores with Very-High-Level Heat Resistance Germinate Poorly in Rich Medium despite the Presence of ger Clusters but Efficiently upon Exposure to Calcium-Dipicolinic Acid. *Appl Environ Microbiol*. 2015 Nov 15; 81(22):7791–801. <https://doi.org/10.1128/AEM.01993-15> PMID: 26341201
35. Bati A. *The Cigar Companion: The Connoisseur's Guide*. 3rd ed. 1997. 27 p.
36. Wayne GF, Connolly GN, Henningfield JE. Assessing internal tobacco industry knowledge of the neurobiology of tobacco dependence. *Nicotine Tob Res Off J Soc Res Nicotine Tob*. 2004 Dec; 6(6):927–40.
37. Allen JG, Flanigan SS, LeBlanc M, Vallarino J, MacNaughton P, Stewart JH, et al. Flavoring Chemicals in E-Cigarettes: Diacetyl, 2,3-Pentanedione, and Acetoin in a Sample of 51 Products, Including Fruit-, Candy-, and Cocktail-Flavored E-Cigarettes. *Environ Health Perspect [Internet]*. 2015 Dec 8 [cited 2017 Dec 18];124(6). Available from: <http://ehp.niehs.nih.gov/15-10185>
38. Barrington-Trimis JL, Samet JM, McConnell R. Flavorings in Electronic Cigarettes: An Unrecognized Respiratory Health Hazard? *JAMA*. 2014 Dec 17; 312(23):2493. <https://doi.org/10.1001/jama.2014.14830> PMID: 25383564
39. Kreiss K, Gornaa A, Kullman G, Fedan K, Simoes EJ, Enright PL. Clinical Bronchiolitis Obliterans in Workers at a Microwave-Popcorn Plant. *N Engl J Med*. 2002 Aug; 347(5):330–8. <https://doi.org/10.1056/NEJMoa020300> PMID: 12151470
40. Garten S, Falkner RV. Role of mentholated cigarettes in increased nicotine dependence and greater risk of tobacco-attributable disease. *Prev Med*. 2004 Jun; 38(6):793–8. <https://doi.org/10.1016/j.ypmed.2004.01.019> PMID: 15193900
41. Sidney S. Mentholated cigarette use and lung cancer. *Arch Intern Med*. 1995 Apr 10; 155(7):727–32. PMID: 7695461
42. Gilardi GL. Infrequently Encountered *Pseudomonas* Species Causing Infection in Humans. *Ann Intern Med*. 1972 Aug 1; 77(2):211. PMID: 4641655
43. Hage JE, Schoch PE, Cunha BA. *Pseudomonas pseudoalcaligenes* Peritoneal Dialysis-Associated Peritonitis. *Perit Dial Int*. 2013 Mar 1; 33(2):223–4. <https://doi.org/10.3747/pdi.2012.00112> PMID: 23478381
44. BF01708356.pdf [Internet]. [cited 2018 Nov 13]. <https://link.springer.com/content/pdf/10.1007/BF01708356.pdf>
45. Stepanovic S, Jezek P, Vukovic D, Dakic I, Petras P. Isolation of Members of the *Staphylococcus sciuri* Group from Urine and Their Relationship to Urinary Tract Infections. *J Clin Microbiol*. 2003 Nov 1; 41(11):5262–4. <https://doi.org/10.1128/JCM.41.11.5262-5264.2003> PMID: 14605178
46. Stepanović S, Ježek P, Dakić I, Vuković D, Seifert L. *Staphylococcus sciuri*: an unusual cause of pelvic inflammatory disease. *Int J STD AIDS*. 2005 Jun; 16(6):452–3. <https://doi.org/10.1258/0956462054093999> PMID: 15969784

47. Shittu A. Isolation and molecular characterization of multiresistant *Staphylococcus sciuri* and *Staphylococcus haemolyticus* associated with skin and soft-tissue infections. *J Med Microbiol*. 2004 Jan 1; 53(1):51–5.
48. Horii Toshinobu M M Suzuki Yasuhiro, Kimura Taku, Kanno Takashi. Intravenous Catheter-related Septic Shock Caused by *Staphylococcus sciuri* and *Escherichia vulneris*. *Scand J Infect Dis*. 2001 Jan 1; 33(12):930–2. PMID: [11868769](https://pubmed.ncbi.nlm.nih.gov/11868769/)
49. Cruz AT, Cazacu AC, Allen CH. *Pantoea agglomerans*, a Plant Pathogen Causing Human Disease. *J Clin Microbiol*. 2007 Jun 1; 45(6):1989–92. <https://doi.org/10.1128/JCM.00632-07> PMID: [17442803](https://pubmed.ncbi.nlm.nih.gov/17442803/)
50. Holt HM, Søgaaard P, Gahrn-Hansen B. Ear infections with *Shewanella* alga: a bacteriologic, clinical and epidemiologic study of 67 cases. *Clin Microbiol Infect*. 1997 Jun 1; 3(3):329–34. PMID: [11864129](https://pubmed.ncbi.nlm.nih.gov/11864129/)
51. Kappstein I, Grundmann H, Hauer T, Niemeyer C. Aerators as a reservoir of *Acinetobacter junii*: an outbreak of bacteraemia in paediatric oncology patients. *J Hosp Infect*. 2000 Jan; 44(1):27–30. <https://doi.org/10.1053/jhin.1999.0648> PMID: [10633050](https://pubmed.ncbi.nlm.nih.gov/10633050/)
52. Nemec A, De Baere T, Tjernberg I, Vaneechoutte M, van der Reijden T, Dijkshoorn L. *Acinetobacter ursingii* sp. nov. and *Acinetobacter schindleri* sp. nov., isolated from human clinical specimens. *Int J Syst Evol Microbiol*. 2001 Sep 1; 51(5):1891–9.
53. Wang H-K, Teng L-J, Chen Y-C, Du S-H, Hsueh P-R. *Lactobacillus salivarius* empyema with respiratory failure. *J Microbiol Immunol Infect*. 2017 Dec; 50(6):923–5. <https://doi.org/10.1016/j.jmii.2016.06.001> PMID: [27582357](https://pubmed.ncbi.nlm.nih.gov/27582357/)
54. Hsueh P-R, Teng L-J, Chen Y-C, Yang P-C, Ho S-W, Luh K-T. Recurrent Bacteremic Peritonitis Caused by *Enterococcus cecorum* in a Patient with Liver Cirrhosis. *J Clin Microbiol*. 2000 Jun 1; 38(6):2450–2. PMID: [10835030](https://pubmed.ncbi.nlm.nih.gov/10835030/)
55. Baker RR. Smoke generation inside a burning cigarette: Modifying combustion to develop cigarettes that may be less hazardous to health. *Prog Energy Combust Sci*. 2006 Jan 1; 32(4):373–85.
56. Touey GP and Mumpower RC II. Measurement of the combustion zone temperature of cigarettes. *Tob. Sci*. 1 (1957) 33–37.
57. Larsson L, Szponar B, Ridha B, Pehrson C, Dutkiewicz J, Krysińska-Traczyk E, et al. Identification of bacterial and fungal components in tobacco and tobacco smoke. *Tob Induc Dis*. 2008 Jul 31; 4(1):4.
58. Pauly JL, Smith LA, Rickert MH, Hutson A, Paszkiewicz GM. Review: Is lung inflammation associated with microbes and microbial toxins in cigarette tobacco smoke? *Immunol Res*. 2010 Mar; 46(1–3):127–36. <https://doi.org/10.1007/s12026-009-8117-6> PMID: [19763893](https://pubmed.ncbi.nlm.nih.gov/19763893/)
